# Supplementary material for: One-pot synthesis of hierarchical magnetite nanochain assemblies with complex building units and their application for water treatment
Source: Royal Society of Chemistry journal article supplement (doi:10.1039/c1jm13517a), 2011-01-01
Supplement: c1jm13517a.pdf [file c1jm13517a.pdf]

Supplementary Material (ESI) for Journal of Materials Chemistry  
This journal is (c) The Royal of Chemistry 2010

## One-pot synthesis of hierarchical magnetite nanochain assemblies with complex building units and their application for water treatment

Min-Rui Gao, Shi-Ran Zhang, Jun Jiang, Ya-Rong Zheng, Dong-Qing Tao, Shu-Hong Yu\*

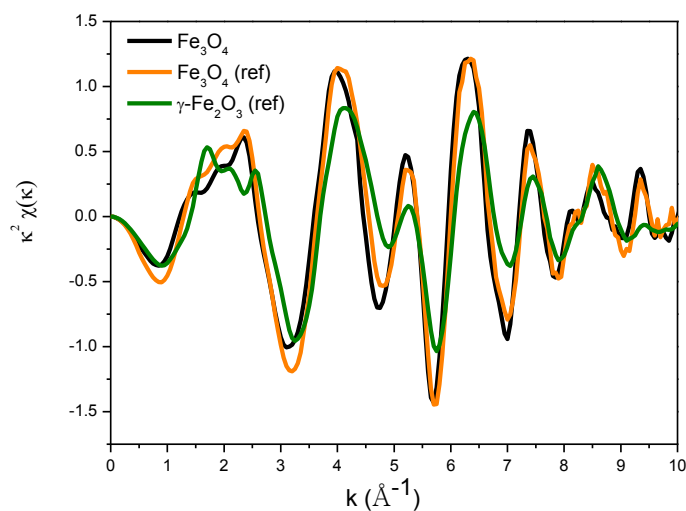

**Fig. S1**  $k^2$ -weighted EXAFS spectra of Fe K-edge from the self-assembled  $\text{Fe}_3\text{O}_4$  nanostructures, referential  $\text{Fe}_3\text{O}_4$  and referential  $\gamma\text{-Fe}_2\text{O}_3$  samples.

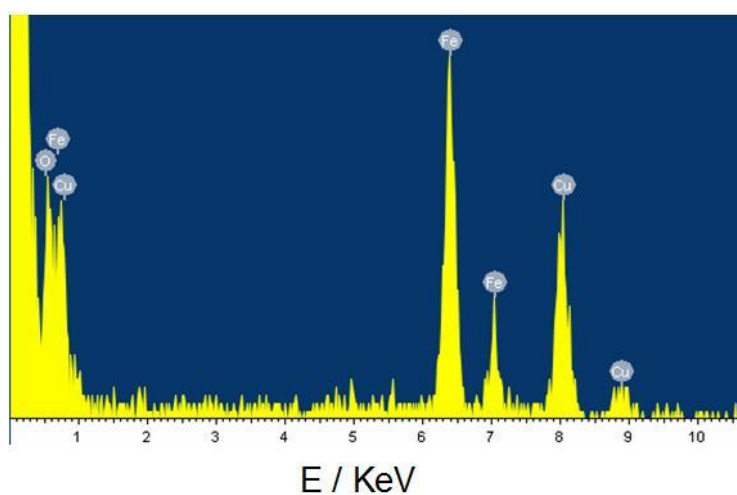

**Fig. S2** Energy-disperse X-ray Spectrum (EDX) taken on a typical flower-like building unit of the hierarchical  $\text{Fe}_3\text{O}_4$  nanochain assemblies.

Supplementary Material (ESI) for Journal of Materials Chemistry  
This journal is (c) The Royal of Chemistry 2010

---

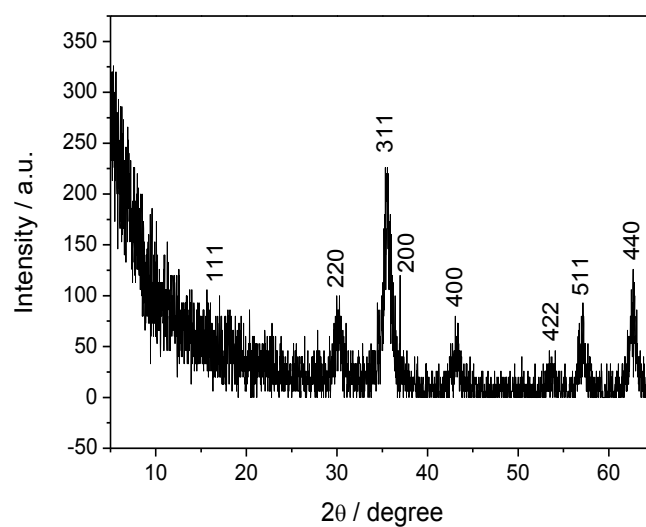

**Fig. S3** XRD pattern of the particles collected after the removal of dye molecules.

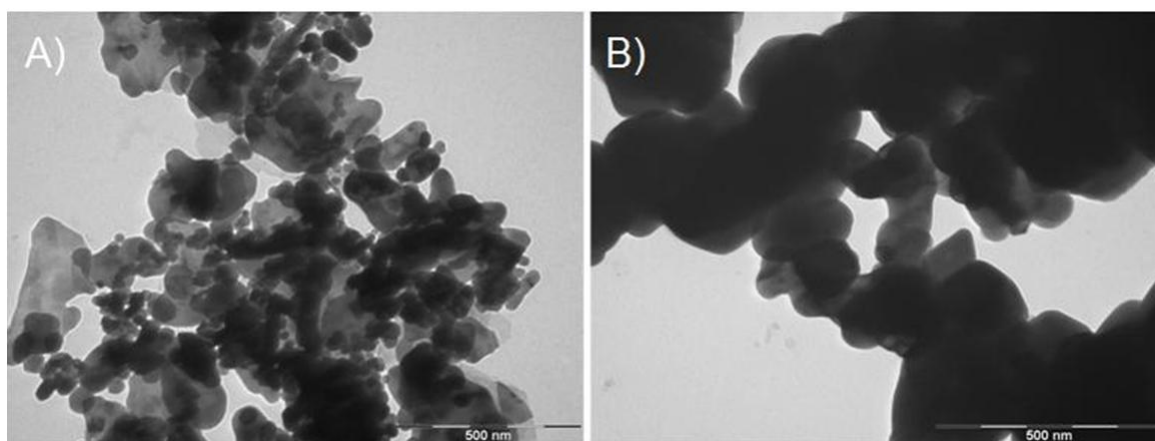

**Fig. S4** TEM images of A) commercial Fe<sub>3</sub>O<sub>4</sub> and B) commercial γ-Fe<sub>2</sub>O<sub>3</sub> materials.

Supplementary Material (ESI) for Journal of Materials Chemistry  
This journal is (c) The Royal of Chemistry 2010

---

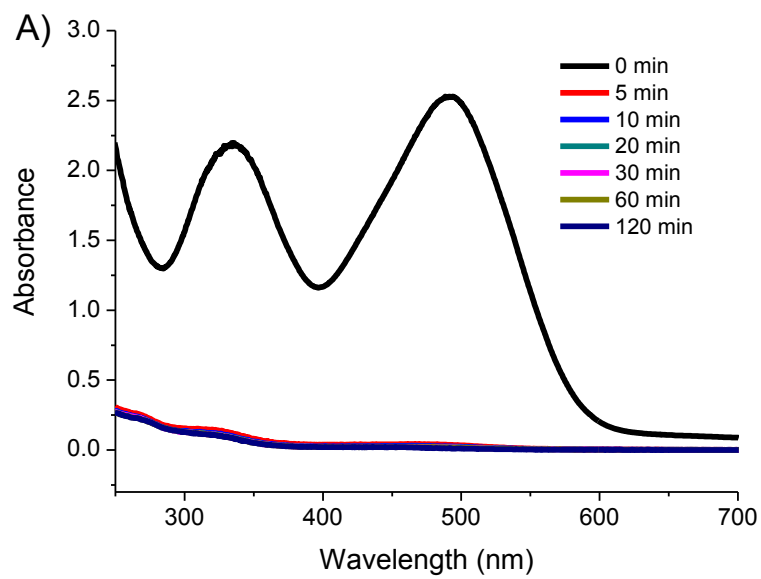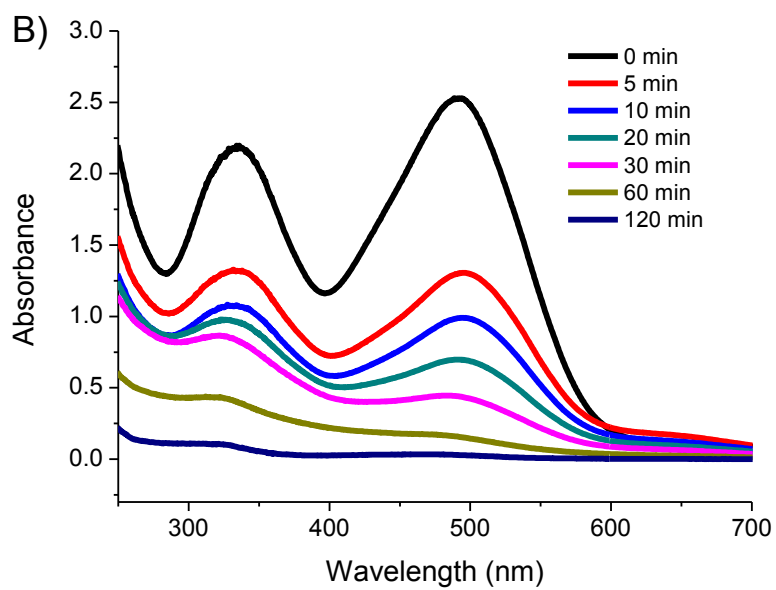

Supplementary Material (ESI) for Journal of Materials Chemistry  
This journal is © The Royal Society of Chemistry 2010

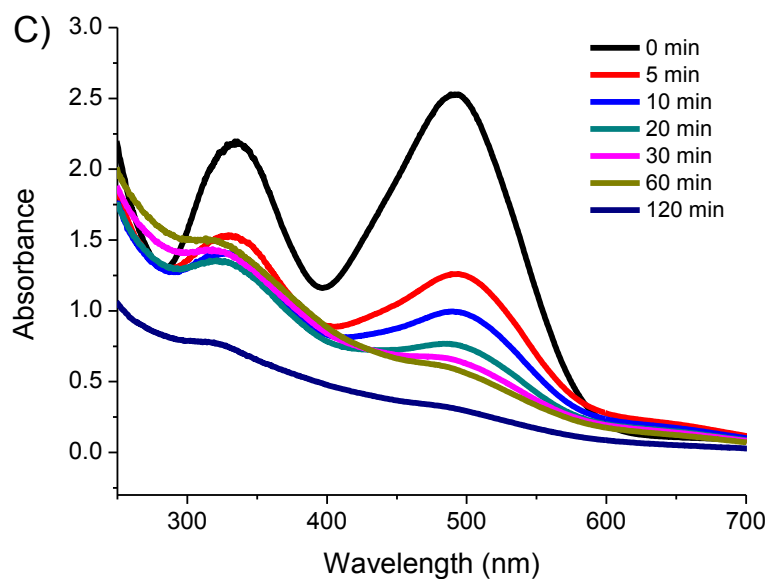

**Fig. S5** Absorption spectra of solutions of Congo red (100 mg/L, 20 mL) in the presence of A) novel Fe<sub>3</sub>O<sub>4</sub> assemblies; B) secondary; C) third renewed materials at time intervals (min) of 0; 10; 20; 30; 60; 120, respectively.
